# Supplementary material
Source: PubMed Central journal article supplement (PMC5102999)
Supplement: mmc1.pdf [file mmc1.pdf]

**Biophysical Journal, Volume 111**

**Supplemental Information**

**Interaction of the Complexin Accessory Helix with Synaptobrevin Regulates Spontaneous Fusion**

**Alexander Vasin, Dina Volfson, J. Troy Littleton, and Maria Bykhovskaia**

## Supporting Material

|                                                                                   |          |     |
|-----------------------------------------------------------------------------------|----------|-----|
|                                                                                   | K83<br>↓ |     |
| Synaptobrevin                                                                     |          |     |
| TSN RRLQQTQAQVDEVVDIMRVNVDKVLERDQKLSLDDRADALQAGASQFET S AAKLKRKYW                 |          | RAT |
| AAQKRLQQTQAQVDEVVDIMRTNVE KVLERS KLSLDDRADALQQGASQFEQQAGKLRKFW                    |          | FLY |
| Syntaxin                                                                          |          |     |
| QALSE IETRHSE I I KLENRLRELHDMFMDMAMLVESQGEMIDRIEYNVEHAVDYV ERAVSDTKKAVK          |          | RAT |
| QTLADIEARHQDIMKLETS IKELHDMFMDMAMLVESQGEMIDRIEYHVEHAMDYVQTATQDTKKALK              |          | FLY |
| SNAP25 SN1                                                                        |          |     |
| RNELEEMQRRADQLADESLESTRRMLQLVEESKDAGIRTLV MLDEQGEQLDRVEEGMNHINQDMKEAEKNLKDL GK    |          | RAT |
| PKTELEELQIN AQGV ADESLESTRRMLALCEESKE AGIRTLV ALDDQGEQLDRI EEGMDQINADMREAENLSGMEK |          | FLY |
| SNAP25 SN2                                                                        |          |     |
| DARENEMDENL E QVS G I IGNLRHMALDMGNEIDT QNRQIDRIMEKADSNKTRIDEANQRATKML            |          | RAT |
| DAREDEMEENMGQVNTMIGNLRNMALDMGS ELENQNRQIDRINR KGESNEARIAVANQRAHQLL                |          | FLY |
| Complexin                                                                         |          |     |
| KKEE ERQEALRQAEERKAKYAKMEAEREVMRQGIRDKYGI                                         |          | RAT |
| EE ERERQEAI KE AEDRRKEKHRKMEERE KMRQDIRDKYNI                                      |          | FLY |
| ↑<br>E34                                                                          |          |     |

**Figure S1.** Homology between the mammalian and *Drosophila* SNARE proteins (substitutions are shown in red). The residues K83 of Syb and E34 of Cpx that mediate the interaction between Syb and Cpx are conserved.

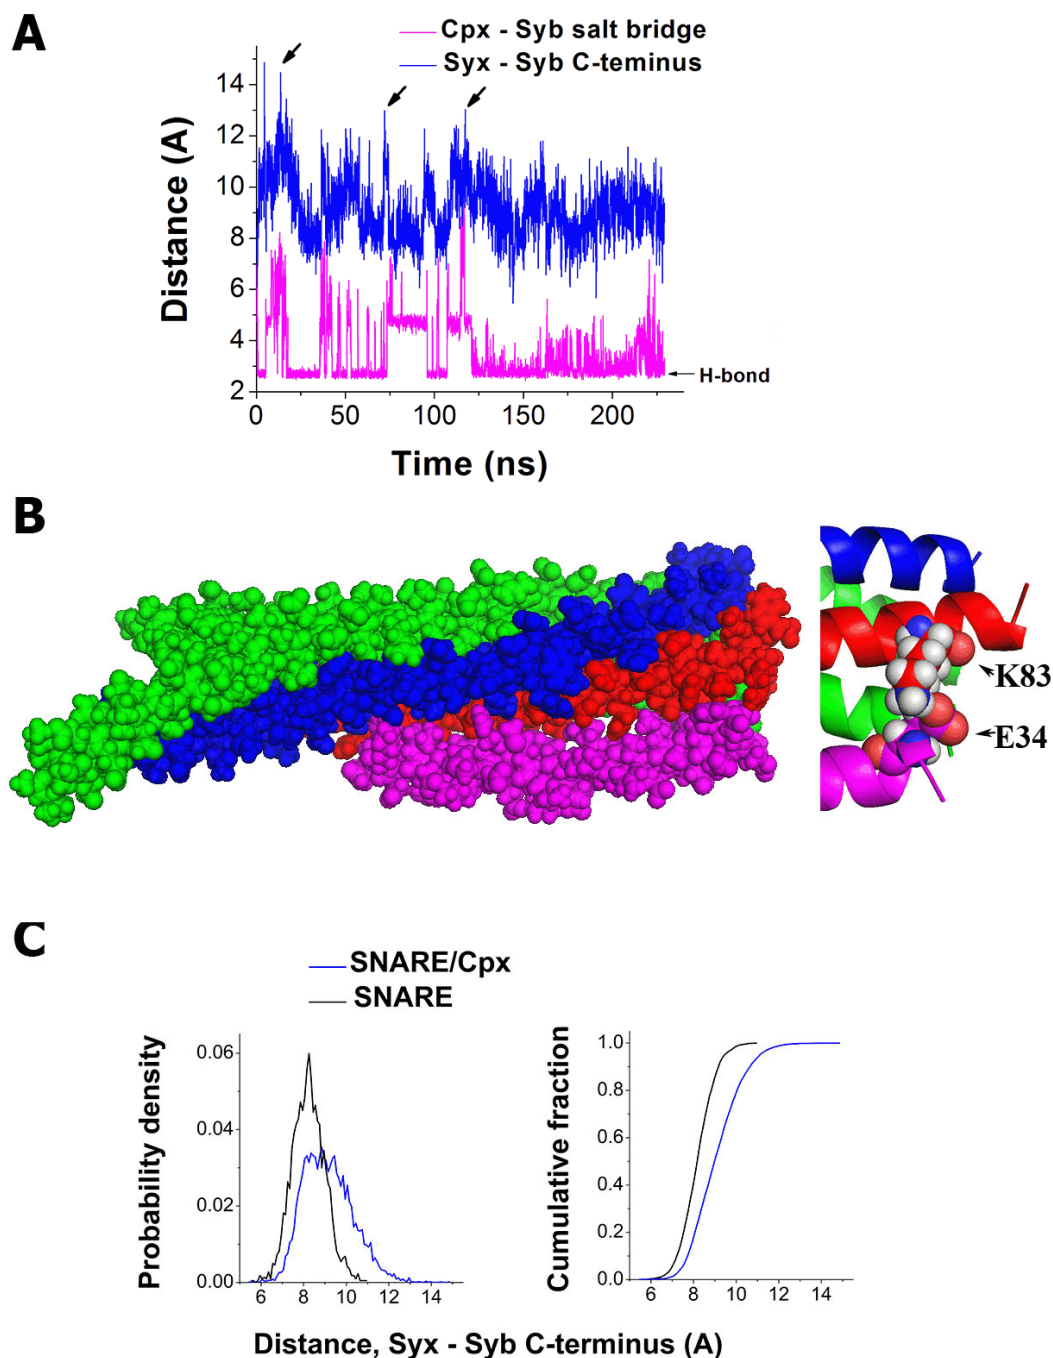

**Figure S2.** MD trajectory of the *Drosophila* SNARE-Cpx complex. **A.** Transients separations of Cpx from Syb, as well as a transient increase in the distance between the Syb and Syx C-termini (arrows) are shown. The distances are computed between C $\alpha$  atoms of Syx and Syb C-terminal residues (blue), and the atoms defining the salt bridge between Syb and Cpx: Nz of Syb K83 and O $\epsilon$  of Cpx E34 (magenta). **B.** The most populated state of the SNARE bundle with the interaction between Syb and Cpx stabilized by a Syb K83 – Cpx E34 salt bridge. **C.** The distribution of the distances between C-terminal residues of Syb and Syx along the MD trajectories of the SNARE bundle and the SNARE-Cpx complex. The presence of Cpx shifts the distribution towards longer distances.

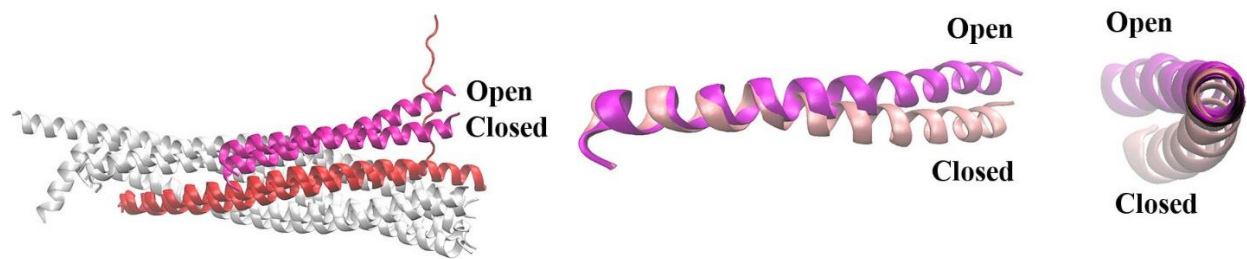

**Figure S3.** The closed state of Cpx produces a bending between the Cpx central and accessory helices, and this kink may serve as a “spring” to accelerate Syb unraveling. Superimposed close and open states of the SNARE-Cpx complex are shown. Magenta: Cpx, red: Syb.

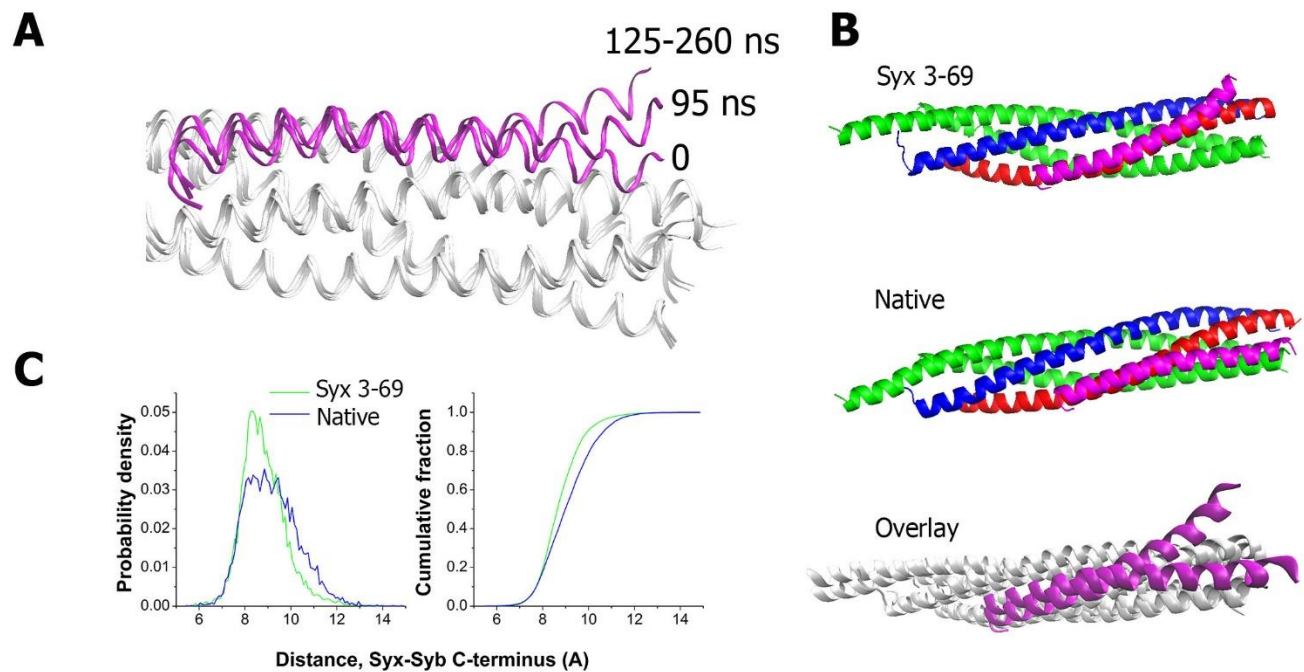

**Figure S4.** MD trajectory of the mutated ( $syx^{3-69}$ ) SNARE-Cpx complex. **A.** Cpx (magenta) position on the bundle in the beginning of the MD trajectory (0), at an intermediate point (95 ns), and at the second half of the trajectory (125-260 ns). The SNARE proteins overlaid at these three points are shown in white. **B.** The  $syx^{3-69}$  mutation changes Cpx conformation. **C.** The mutation shifts the separation between C-terminal residues of Syb and Syx towards shorter distances.

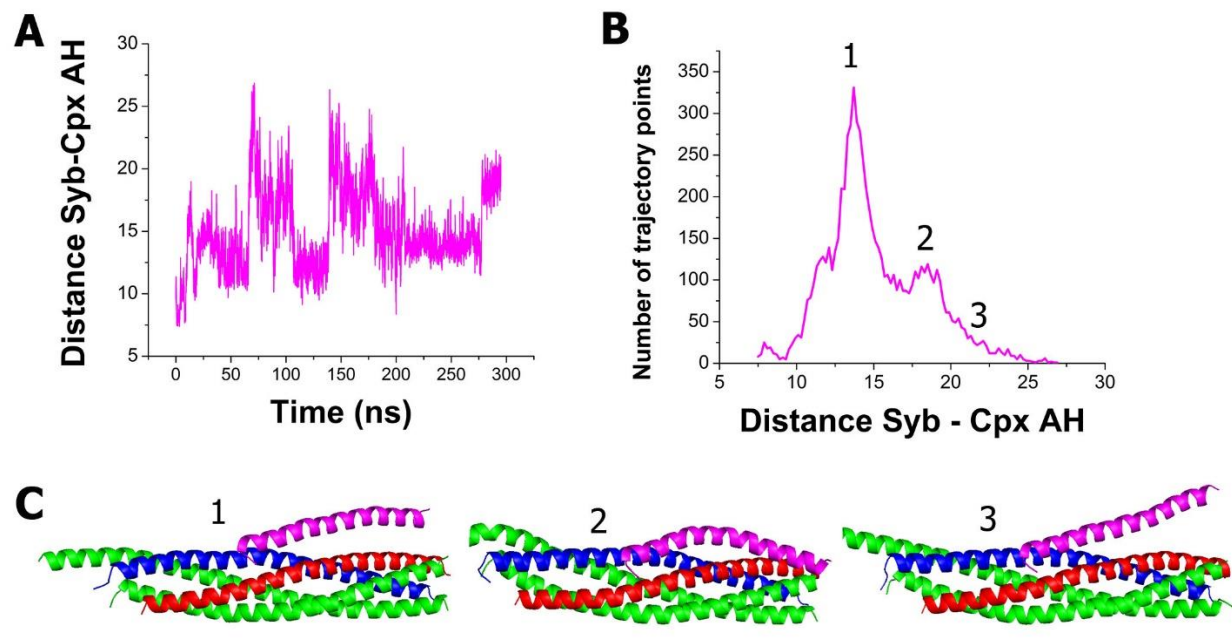

**Figure S5.** The MD trajectory of the SNARE-Cpx complex with the E34A Cpx mutation. **A.** The separation between Cpx AH and Syb. The distance is computed between C $\alpha$  atoms of Cpx A34 and Syb K83. **B.** The frequency distribution of the distance between Cpx AH and Syb along the trajectory showing the states 1-3 (state 1 is the most populated). **C.** Three conformations corresponding to the three states in the panel B. State 1: Cpx lies parallel to the bundle; state 2: Cpx interacts with SN2 (green); state 3: open state of Cpx.

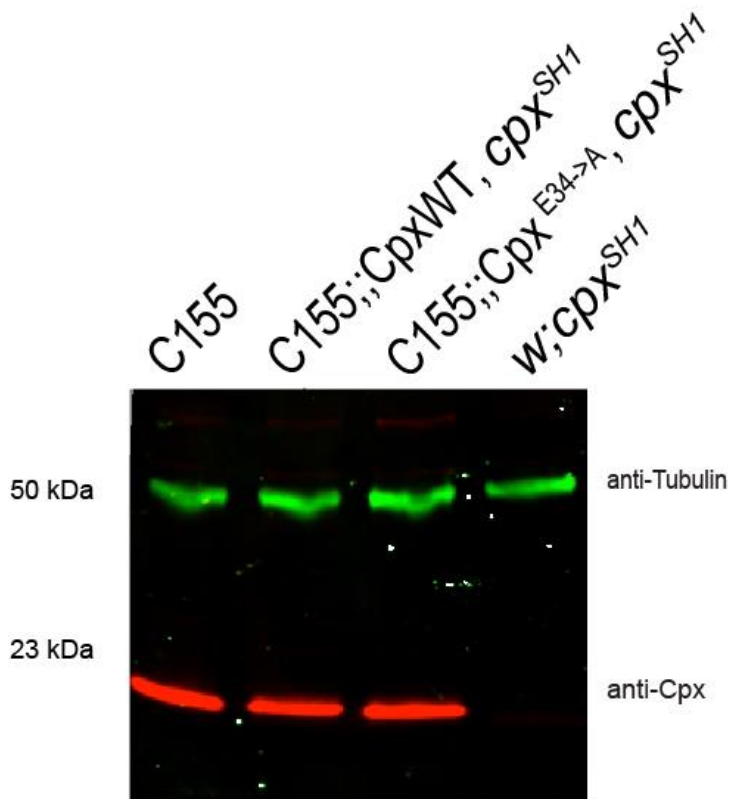

**Figure S6.** Western blot showing similar Cpx expression levels in the mutant line Cpx<sup>E34A</sup>, *cpx<sup>SH1</sup>* and the rescue line Cpx<sup>WT</sup>, *cpx<sup>SH1</sup>*. The *cpx<sup>SH1</sup>* null mutant and the C155 driver line (elav-GAL4) are shown as controls. Anti-Tubulin antisera was used as a loading control.
